# Supplementary material
Source: PubMed Central journal article supplement (PMC6325489)
Supplement: ajtr0010-3978-f8.pdf [file ajtr0010-3978-f8.pdf]

# Immunophenotype of cancer stem cells of human 786-O renal cell carcinoma

## Supplemental Data

786-O SFCs and MACs were harvested in Trizol (Invitrogen) and total RNA was extracted following manufacturer's protocol. First strand cDNA was made using Oligo (dT) 12-18 (Invitrogen) primers, 1.2  $\mu$ g of total RNA, and SuperScript II RNase H Reverse Transcriptase (Invitrogen), according to the manufacturer's recommendations. The target cDNA was amplified using Platinum Taq DNA Polymerase (Invitrogen) for 28 to 30 cycles. The primers were described in our previous paper (Zhong Y, Guan K, Guo S, Zhou C, Wang D, Ma W, Zhang Y, Li C and Zhang S. Spheres derived from the human SK-RC-42 renal cell carcinoma cell line are enriched in cancer stem cells. *Cancer Lett* 2010; 299: 150-160.). Aliquots of 8  $\mu$ l of the amplification products were separated by electrophoresis in 1.2% agarose gels and visualized by ethidium bromide staining.

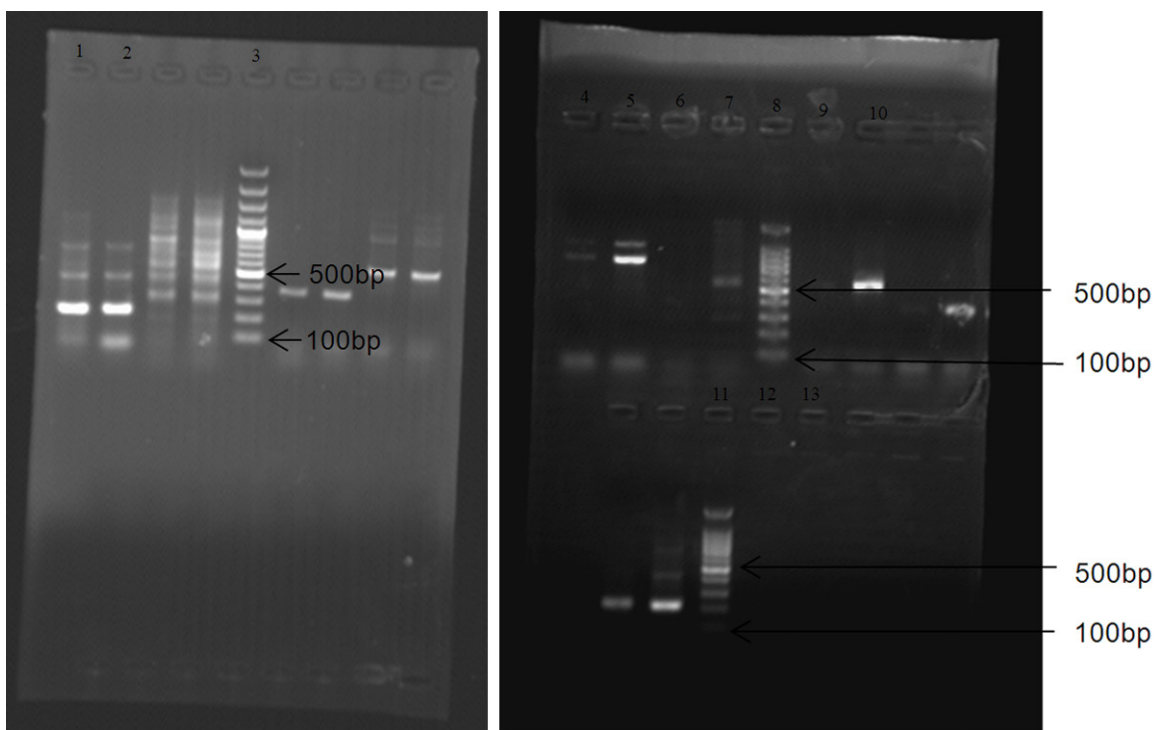

**Figure S1.** Lane 3, 8, 11, 100 bp DNA ladder marker; lane 1:  $\beta$ -actin for 786-O MACs; lane 2:  $\beta$ -actin for 786-O SFCs; lane 4:  $\beta$ -catenin for 786-O MACs; lane 5:  $\beta$ -catenin for 786-O SFCs; Lane 6: Nanog for 786-O MACs; lane 7: Nanog for 786-O SFCs; lane 9: Oct-4 for 786-O MACs; lane 10: Oct-4 for 786-O SFCs; lane 12: Bmi for 786-O MACs; lane 13: Bmi for 786-O SFCs.
